# Supplementary material for: circRNA-AKT1 Sequesters miR-942-5p to Upregulate AKT1 and Promote Cervical Cancer Progression
Source: PubMed Central journal article supplement (PMC7078494; doi:10.1016/j.omtn.2020.01.003), 2020-01-16
Supplement: mmc1.pdf [file mmc1.pdf]

**OMTN, Volume 20**

**Supplemental Information**

**circRNA-AKT1 Sequesters miR-942-5p**

**to Upregulate AKT1 and Promote**

**Cervical Cancer Progression**

**Rongying Ou, Laiming Mo, Huijing Tang, Shaolong Leng, Haiyan Zhu, Liang Zhao, Yi Ren, and Yunsheng Xu**

1 **Supplementary figure 1 Heat-map exhibited the expression of**  
2 **circRNAs in CC tissues and the matched adjacent non-cancerous**  
3 **tissues. (A-B) The heat-map displayed the expression of related circRNAs**  
4 **in CC tissues (n = 3) and the matched adjacent non-cancerous tissues (n =**  
5 **3).**

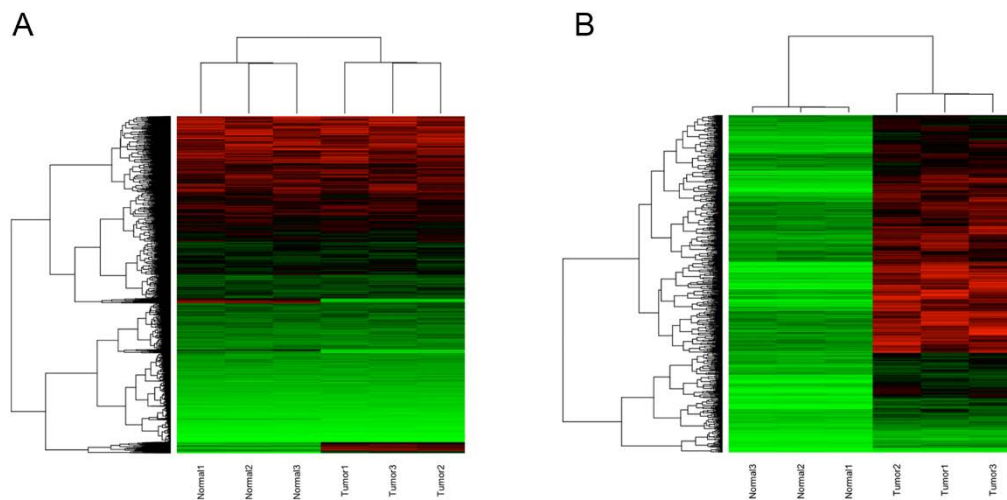

6  
7 **Supplementary figure 2 Northern blot measured the expression of**  
8 **AKT1 or circ-AKT1 in differently treated groups. (A) Northern blot**  
9 **assay detected the RNA expression of AKT1 and circ-AKT1 in RNase R**  
10 **treatment. (B) Northern blot assay detected the RNA expression of AKT1**  
11 **with or without flanking intron treatment (Alu). GAPDH was negative**  
12 **control.**

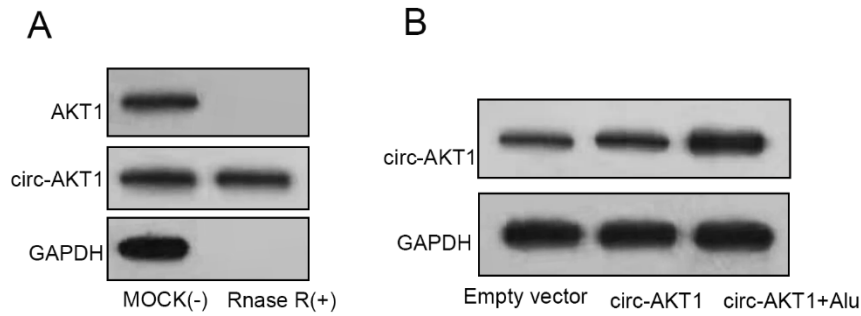

1

2 **Supplementary figure 3 The expression of TGF- $\beta$  in CC tissues and**  
 3 **cells was examined. (A-B) RT-qPCR detected that the expression of TGF-**  
 4  **$\beta$  in CC tissues (n = 58) and cells as well as in corresponding control groups**  
 5 **(n = 58). \*\*P < 0.01**

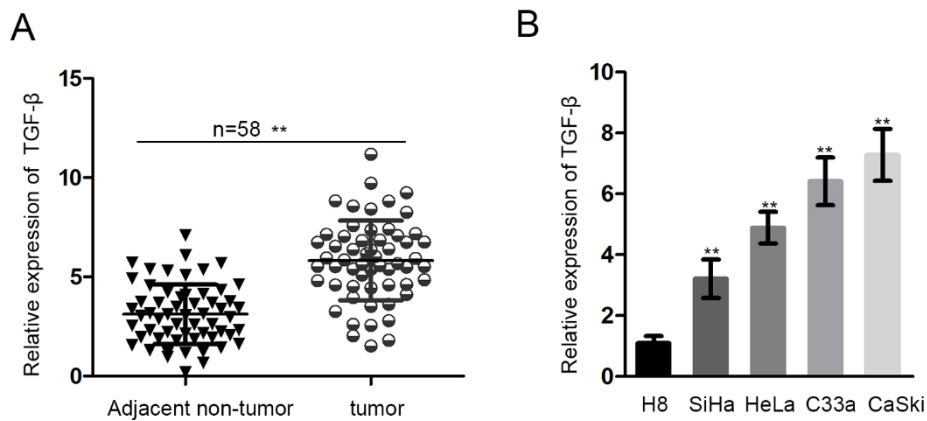

6

7 **Table legends**

8 **Supplementary Table 1 Related sequences of genes were provided.**  
 9 **Related PCR primer sequences and interference/overexpression sequences**  
 10 **were exhibited.**

| <b>Gene name:</b>    | <b>PCR primer sequences:</b>                           | <b>Covergent primers for circ-AKT:</b>             |  |
|----------------------|--------------------------------------------------------|----------------------------------------------------|--|
| circ-AKT1            | F: CGTTCTTCTCCGAGTGCAG<br>R: ACGTTCTTCTCCGAGTGCAG      | F: TGTTGAGGGTTGTCTCCGTG<br>R: GGACAGTCATGAGCTTCGCT |  |
| miR-942-5p           | F: CUUCUCUGUUUUGGCAUGUG<br>R: CTCTACAGCTATATTGCCAGCCAC |                                                    |  |
| AKT1                 | F: CCTTCTTGAGCAGCCCTGAA<br>R: TACGAGATGATGTGCGGTCG     |                                                    |  |
|                      |                                                        |                                                    |  |
| <b>Plamids name:</b> | <b>Sequences:</b>                                      |                                                    |  |
| siRNA                | CUGACCAAGGUGGAAGAACAG                                  |                                                    |  |
| circ-AKT1-siRNA#1    | GUGGAAGAACAGCUUGGUCAG                                  |                                                    |  |
| circ-AKT1-siRNA#2    | CACCACCUGACCAAGCUGUUC                                  |                                                    |  |
| circ-AKT1-siRNA#3    | CACCUGACCAAGCUGUUCUUC                                  |                                                    |  |
| si-AKT1#1            | GCACCUUCAUUGGCUACAA                                    |                                                    |  |
| si-AKT1#2            | GGCCCAACACCUUCAUCAU                                    |                                                    |  |
| si-AKT1#3            | GGAGACUGACACCAGGUAU                                    |                                                    |  |
| NC inhibitor         | CACAUGGCCAAAACCUUCUCUA                                 |                                                    |  |
| miR-942-5p inhibitor | CACAUGGCCAAAACAGAGAAGA                                 |                                                    |  |
| NC mimics            | UAGAGAAGGUUUUGGCAUGUG                                  |                                                    |  |
| miR-942-5p mimics    | UCUUCUCUGUUUUGGCAUGUG                                  |                                                    |  |

1

2 **Supplementary Table 2 The accession number for the first 50**

3 **upregulated circRNAs in CC tissues was provided.**

| <b>circRNA</b> | <b>Accession number</b> |  |  |  |  |
|----------------|-------------------------|--|--|--|--|
| circ-AKT1      | NM_005163               |  |  |  |  |
| circ-DCLK2     | NR_036614               |  |  |  |  |
| circ-CAMK2D    | NM_001221               |  |  |  |  |
| circ-PLOD2     | NM_000935               |  |  |  |  |
| circ-AGGF1     | NM_018046               |  |  |  |  |
| circ-BBS9      | NM_014451               |  |  |  |  |
| circ-EPB41     | NM_004437               |  |  |  |  |
| circ-ANKS1B    | NM_152788               |  |  |  |  |
| circ-TRIAP1    | NM_016399               |  |  |  |  |
| circ-ANKRD36   | NM_001164315            |  |  |  |  |
| circ-MBOAT2    | NM_138799               |  |  |  |  |
| circ-KDM4B     | NM_015015               |  |  |  |  |
| circ-HSF4      | NM_001040667            |  |  |  |  |
| circ-EXOC6     | NM_019053               |  |  |  |  |
| circ-PITPNB    | NM_012399               |  |  |  |  |
| circ-PTPN12    | NM_002835               |  |  |  |  |
| circ-PARD3     | NM_019619               |  |  |  |  |
| circ-FGD5      | NM_152536               |  |  |  |  |
| circ-GLB1      | NM_000404               |  |  |  |  |
| circ-PTDSS1    | NM_014754               |  |  |  |  |
| circ-PHACTR4   | NM_023923               |  |  |  |  |
| circ-RAPGEF1   | NM_005312               |  |  |  |  |
| circ-ZNF717    | NM_001128223            |  |  |  |  |
| circ-PAN3      | NM_175854               |  |  |  |  |
| circ-SLC4A5    | NM_021196               |  |  |  |  |
| circ-RNPS1     | NM_006711               |  |  |  |  |
| circ-HDAC11    | NM_024827               |  |  |  |  |
| circ-PAPPA     | NM_002581               |  |  |  |  |
| circ-EPB41L5   | NM_020909               |  |  |  |  |
| circ-VCAN      | NM_004385               |  |  |  |  |
| circ-PHKB      | NM_000293               |  |  |  |  |
| circ-WSB1      | NM_015626               |  |  |  |  |
| circ-TRIM37    | NM_015294               |  |  |  |  |
| circ-DPY19L1   | NM_015283               |  |  |  |  |
| circ-MAST2     | NM_015112               |  |  |  |  |
| circ-AK127472  | uc003qaq.1              |  |  |  |  |
| circ-NFAT5     | NM_006599               |  |  |  |  |
| circ-SLMAP     | NM_007159               |  |  |  |  |
| circ-ADAMTS6   | NM_197941               |  |  |  |  |
| circ-MLLT6     | NM_005937               |  |  |  |  |
| circ-NR3C2     | NM_000901               |  |  |  |  |
| circ-KMT2E     | NM_018682               |  |  |  |  |
| circ-SLC3A2    | NM_002394               |  |  |  |  |
| circ-DOCK2     | NM_004946               |  |  |  |  |
| circ-STXBP4    | NM_178509               |  |  |  |  |
| circ-CANX      | NM_001746               |  |  |  |  |
| circ-TRIO      | NM_007118               |  |  |  |  |
| circ-FADS2     | NM_004265               |  |  |  |  |
| circ-STARD7    | NM_020151               |  |  |  |  |
| circ-NAV3      | NM_014903               |  |  |  |  |

1

2

3

1 **1. Over-expressed loop-assisted sequence of circ-AKT1 :**

2 **pcDNA3.1/ circ-AKT1**

3 AGTAGAGACGGGGTTTACCATGTTGGCCAGGCTGGTCTTCACTTTTGTAAAGGTACGTACTAATGACTTTTTTTTATACT  
4 TCAGCTGTTCTTCCACCTGTCCCGGGAGCGTGTGTCTCCGAGGACCGGGCCCGCTTCTATGGCGCTGAGATTGTGTCAGCCC  
5 TGGACTACCTGCACCTCGGAGAAGAACGTGGTGTACCGGGACCTCAAGGTGCGCTGGCGGGCAGGCAGGGGGCAGGGCCCT  
6 GGGGGCCTGGCGGCACTGACCTGAGGCCACCTTTCCCTAGCTGGAGAACCTCATGCTGGACAAGGACGGGCACATTAAG  
7 ATCACAGACTTCGGGCTGTGCAAGGAGGGGATCAAGGACGGTGCCACCATGAAGACCTTTTGGCGCACACCTGAGTACCT  
8 GGCCCCGAGGTGTGCCCCCCACCTGCGTGCATACGCGTTGTGCGTCCCCACGTCTGAGCACACGCAATGTGTGTCC  
9 TCTCTGTGCCCAAGCAGTACACCTCCCCGGCAGTGTCCCGACACCCCTTGATGCCGAGTCTGCCATCTGCCAC  
10 CCGTGCAGGTGCTGGAGGACAATGACTACGGCCGTGACGTGGACTGGTGGGGCTGGCGTGGTCATGTACGAGATGATG  
11 TGCGGTGCGCTGCCCTTCTACAACCAGGACCATGAGAAGCTTTTGGAGTCTCCTCATGGAGGAGATCCGCTTCCCGCG  
12 CACGCTTGGTCCCGAGGCCAAGTCTTGTCTTTCAGGGCTGCTCAAGAAGGACCCCAAGCAGAGGTGAGGGCCGCCATCC  
13 CAGCTACAGGTACACCTCCATCCCCTCATCCCCAGGCTGCACCTGCCCTGCGCCAGGCGGTCTGGCACCTCCCAGAC  
14 TACTGATAGCCAAAGCTTGATGTCCTTGCCAGGGCTGATCTCCAAAGCCTCAGGCCAAGCAGAGTGGCGGGCAGGC  
15 CGGGTTCAGTTGGGCCTGTGCCCAACCTGCAGCTGCACCCACCCACTCAGGAAGCCCTGCCCTGCCGTGAGCTCT  
16 GTGGTGCTTTGCTACCCACAGCTGCTCAGGACGCTGCACACCAGGCTCCCCTCCCTGGCCCCGGAACGTCTGTCTGGC  
17 GGGCCCTACATCACAGGAGGAAGGGCCTGAACCCAGGGCCTGGCAGGTGGCGGTACCGACACTGTGGCCTTGTTCCT  
18 GCCTGCAGGCTTGGCGGGGGCTCCGAGGACGCCAAGGAGATCATGCAGCATCGTTCTTTGCCGGTATCGTGTGCAGCA  
19 CGTGTACGAGAAGAAGGTGGCGGTGCTCCCCGCATATTCACGCGACGCATGCTCCCCACATATCCACACTCACGCATGC  
20 ACGTGGCACGCTGCCAGATTCCACACACTCGCCCTCACCTCAGGAGCCTGCTGCAGTCTGGTACAAGGAGGGCCTT  
21 GCTGCACCAACCTCAGCGCCTGGTGCTCAGAGGCTCTGGCACTGCCGGTCCACCAGGAAACTGGCCTGGTCTCATTT  
22 CCTCTCCCCTCGGAGGTGTGTACACTCTGAGTTTCTCTCCCCTCGGAGGTGTGTACACTCTGAGTGCCAGCCTTG  
23 GGGTTCCTTCCCTGACGCTGTGCAGTGAAGGCTGGTGGTGGTGGACCAGGGGTGCTGCCCTTGGCCTCCACGAGTTC  
24 CTCCTGTTTGACCTCAATCCCTTCTGCCGAAGGAGAGCCAGCCCTATTTCTGGCTGTGCAGGGACAGGGACAGCACCT  
25 ACTTTTCTGGCACATGGGGGAGTCCGCCCTGGAGGGAGGCAGCTCTTCTGCATGAGTCGCCATCCTGGGTGCTCATCTT  
26 TCAGGGACCCTAGGAGCCCTGGCCATCACCAGCTGATGGGGTCTGCCAGTGGGTTCGGAAGCCTGCACCTGAGATG  
27 CTGGGTGCCCTGTACCAGGTGTGCTTCTGCCCCGTTCCAGCCTGCCCTCCCCTGAATGCCTGTCTAGGCTGTGTGC  
28 AGCTGGTGGGCTGGGAGCCCTGGGACCCAGCTGGGCACCTGTTCTCCATTAACACAGGGTGCCTGGTCTGGTCCC  
29 CGTTCCTGCCTTGGGCTGCCACCCTCCTGCCCTGCCCTCAAGGGTATGGGGGGCCTGGGCAGTGTCAACCTCTGCC  
30 CAGCCTTGACCAGAGACCTTGCTAATTGACAATGGACAATGCTGGTCCCAGCCAGACTCTGGGTGGGGCAGTGTG  
31 AGGGGGTCCCTGACTGTGGGACCTGAGGGGCTCTCTGGCAGTCTCAGTGTGCACATCACCTTATAGTACCCTTCAT  
32 CCTGGGTCAATTGAGAGTCTGTCTGCAGCCAGATGCCAGCAGGCTGTGGTCTGTAGTCCCTGAGCCATGGAGGCAGGGT  
33 GGGTCTATCTGTGCACCTTGTTCACAGTCTCCCTCTTTCCCAATTTACAAGAAGACCAATAAGAAAAATAAGAAAACA  
34 AGAAAGAAAAAGAAAAATAAGTTATCACCTCCTGGTAGCAGGGAGGGTCTCTCAGAGCTGGGCTGCACTACCTCCTGT  
35 CGCCTGCTGGGGCTGTGTGAGGGCAGCTTTGCGTCTCAGCTGTTGAGGGTGTCTCCGTGCTCCTGCACCCCTCATGTC  
36 CCTCCCTCCCAGAGCTGCCTCTGTGGGGGGCTGGTGGCTTGTGCTCTCTGACATCAGTCTGCCTGGAGACCCCTTGG  
37 GATCCAGGTGCTTTGAAGTCTTGAGCACACTTGAGGGTGTGCTGGGAGTGGGAGCGAAGCTCATGACTGTCCCGTCTG  
38 CCCACCTCTGCAGCTCAGCCACCCTTCAAGCCCCAGGTCACGTCCGAGACTGACACCAGGTATTTGATGAGGAGTTCA  
39 CGGCCAGATGATCCATCACACCACCTGACCAAGGTAAGAAGCAAGGAAAAGAATTAGAGACCAGCCTGGCCAACATGGT  
40 AAACCTTGTCTACT

41

## 2. Hsa\_circ\_0033550 circRNA Genomic Sequence:

1  
2 CTGTTCTTCCACCTGTCCCGGAGCGTGTGTTCTCCGAGGACCGGGCCCGCTTCTATGGCGCTGAGATTGTGTCAGCCCT  
3 GGACTACCTGCACTCGGAGAAGAACGTGGTGTACCGGGACCTCAAGGTGCGCTGGCGGGCAGGCAGGGGGCAGGGCCCT  
4 GGGGGCCTGGCGGCACTGACCTGAGGCCACCTTTCCCTAGCTGGAGAACCTCATGCTGGACAAGGACGGGCACATTAAG  
5 ATCACAGACTTCGGGCTGTGCAAGGAGGGGATCAAGGACGGTGCCACCATGAAGACCTTTTGCGGCACACCTGAGTACCT  
6 GGCCCCGAGGTGTGCGCCCCACCTGCGTGCATACGCGTTGCTGCGTCCCCACGTCTGAGCACACGCAATGCTGTGTCC  
7 TCTCTGTGCCCAAGCAGTCACACCTCCCCGGCAGTGTCCGGACACCCCTTGATGCCGAGTCTGCCATCTGCCAC  
8 CCGTGCAGGTGCTGGAGGACAATGACTACGGCCGTGCACTGGACTGGTGGGGCTGGGCGTGGTACGTACGAGATGATG  
9 TCGGGTTCGCTGCCCTTCTACAACCAGGACCATGAGAAGCTTTTTGAGCTCATCCTCATGGAGGAGATCCGCTTCCCGC  
10 CACGCTTGGTCCCAGGCCAAGTCTTGTCTTTCAGGGCTGCTCAAGAAGGACCCCAAGCAGAGGTGAGGGCCGCCATCC  
11 CAGTACAGGCTACACCTCCATCCCTCATCCCCAGGCTGCACCTGCCCTGCGCCAGGCGGTCTGGCACCTCCAGAC  
12 TACTGATAGCCAAAGCTTGATGTCTTGGCCAGGGCTGATCTCAAAGCCTCAGGCCAAGCAGAGTGGCGGGCAGGC  
13 CGGGTTCAGTTGGGCTCTGTCCCAACCTGCAGCCTGCACCCACCACTCAGGAAGCCCTGCCCTGCCGTGAGCTCT  
14 GTGGTGTCTTGTACCCACAGCTGCTCAGGGACGTGCACCACCGGCTCCCCTCCCTGGCCCCGGAACGTCTGTCTGGC  
15 GGGCCCTACATCACAGGAGGAAGGGCCCTGAACCCAGGGCTGGGCAGGTGGCGGTACCGACACTGTGGCCTTGTTCCT  
16 GCCTGCAGGCTTGGCGGGGCTCCGAGGACGCCAAGGAGATCATGCAGCATCGTTCTTTGCCGTATCGTGTGGCAGCA  
17 CGTGTACGAGAAGAAGGTGCGGCTGTCCCCGCATATTCACGCGCACGCATGCTCCCCACATATCCACACTCAGCATGC  
18 ACGTGGCACGCTCGCCAGATTCCACACACTCGCCCTCACCTCAGGAGCCTGCTGCAGTCTGGTACAAGGAGGGCCTT  
19 GCTGCACCAACCTCAGCGCTGGTGTCTCAGAGGCTCTGGCACTGCCGGTTCACCAGGAAACTGGCCTGGTCTCATTT  
20 CCTCTCCCCTCGGAGGTGTGTCACTCTGAGTTTCTCTCCCCTCGGAGGTGTGTCACTCTGAGTGCCAGCCTTG  
21 GGGTTCCTTCCCTGACGCTGTGCAGTGAAGGCTGGTGGTGGTGGACCAGGGTGTGCCCTTGGCCTCCACGAGTTC  
22 CTCCTGTTGACCTCAATCCCTTCTGCCGAAGGAGAGCCAGCCCTATTTCTGGCTGTGCAGGGACAGGGACAGCACCT  
23 ACTTTTCTGGCACATGGGGGAGTCCGCCCTGGAGGGAGGCAGCTCTTCTGCATGAGTCCCATCTGGGTGCTCATCTT  
24 TCAGGGACCCTAGGAGCCCTGGCCATCACCCAGTGTATGGGGTCTGCCAGTGGGTTCGGAAGCCTGCACCTGAGATG  
25 CTGGGTGCCCTGTACCAGGTGTGCTTCTGCCCGTTCCAGCCTGCCCTCCCCTGAATGCCTGTCTAGGTGTGTGC  
26 AGCTGGTCCGGCTGGCAGCCCTGGGACCCAGCTGGGCACCTGTTCTCCATTAACACAGGGTGCCTGGTCTGTGCC  
27 CGTCTGCCTTGAGGCTGCCACCCTCTGCCCTGCCCTCAAGGGTATGGGGGGCTGGGCAGTGTCAACCTCTGCC  
28 CAGCCTTGACCAGAGACCTTGCTAATTGACAATGGACAATGCTGGTGGCCAGCCAGACTCTGGGGTGGGGCAGTGTG  
29 AGGGGGTCTTGACTGTGGGACCTGAGGGGCTCTCTGGCAGCTCCTCAGTGTGCACATCACCTTATAGTACCCCTCAT  
30 CCTGGGTCAATTGAGAGTCTGTCTGCAGCCAGATGCCAGCAGGCTGTGGTCTGTAGTCCCTGAGCCATGGAGGCAGGGT  
31 GGGTCACTCTGTGCACCTTGTTCACAGTCTCCCTTTCCCAATTTACAAGAAGACCAATAAGAAAAATAAGAAAACA  
32 AGAAAGAAAAAGGAAAAATAAGTTATCACCTCCTGGTAGCAGGGAGGGTCTCTCAGAGCTGGGCTGCACTACCTCCTGT  
33 CGCTGTGGGGTGTGTGAGGGCAGCTTTGCGTCTCAGCTGTTGAGGGTGTCTCCGTGCTCTGCACCCCTCATGTC  
34 CCTCCCTCCAGAGCTGCCTCTGTGGGGGCTGGTGGCTGTGCTCTCTGACATCAGTCTGCCTGGAGACCCCTTGG  
35 GATCCAGGTGCTTTGAAGGTCTTGAGCACACTTGAGGGTGTGCTGGGAGTGGGGAGCGAAGCTCATGACTGTCCCGTCTG  
36 CCCACCTCTGCAGCTCAGCCACCCTTCAAGCCCCAGGTCACGTCCGAGACTGACACCAGGTATTTTGTGAGGAGTTCA  
37 CGGCCAGATGATCACCATCACACCACCTGACCAAG  
38  
39  
40
